# Supplementary material
Source: Springer Nature journal article supplement (https://www.springermedizin.de/resource/supplementary/13045_2009_77_MOESM1_ESM.pdf/9660612)

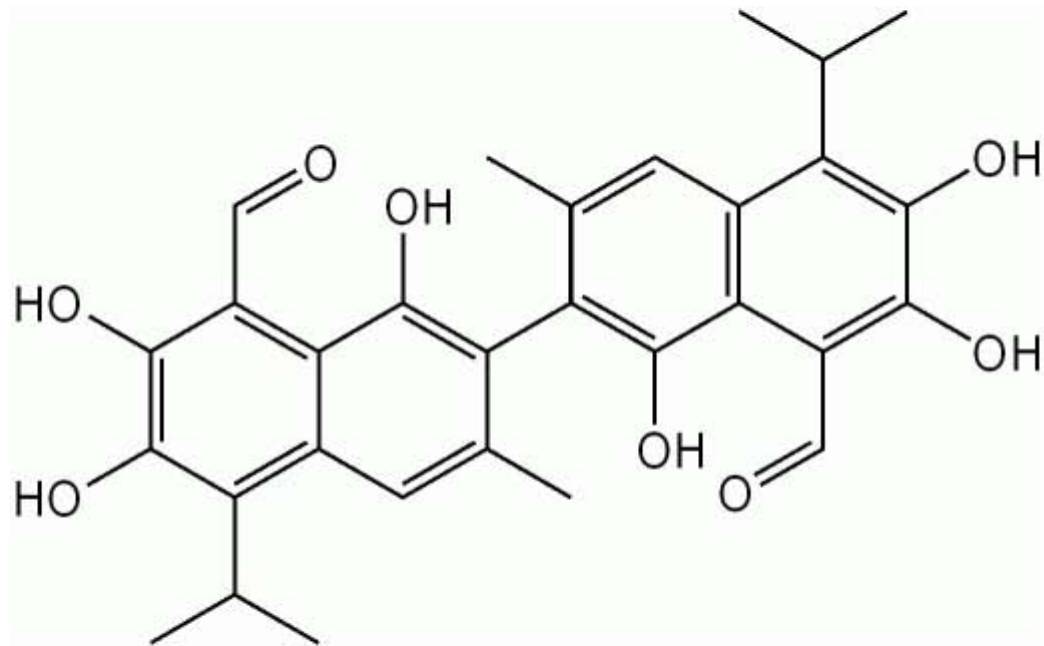

Gossypol

Supplement: MOESM1 [file 9660612]
